# Supplementary material for: Highly fluorescent dual-emission red carbon dots and their applications in optoelectronic devices and water detection
Source: Royal Society of Chemistry journal article supplement (doi:10.1039/c8nj06074f), 2019-01-01
Supplement: c8nj06074f1.pdf [file c8nj06074f1.pdf]

Electronic Supplementary Material (ESI) for New Journal of Chemistry.  
This journal is © The Royal Society of Chemistry and the Centre National de la Recherche Scientifique 2018

## Supporting Information

### Synthesis of highly fluorescent dual-emission red carbon dots and their applications in optoelectronic devices and water detection

Qingwen Guan,<sup>a</sup> Rigu Su,<sup>a</sup> Miaoran Zhang,<sup>a</sup> Rui Zhang,<sup>a</sup> Weijun Li,<sup>a</sup> Dong Wang,<sup>\*b</sup>

Meng Xu,<sup>b</sup> Ling Fei,<sup>c</sup> Quan Xu<sup>\*a</sup>

State Key Laboratory of Petroleum Resources and Prospecting, China University of Petroleum-Beijing, 102249, China;

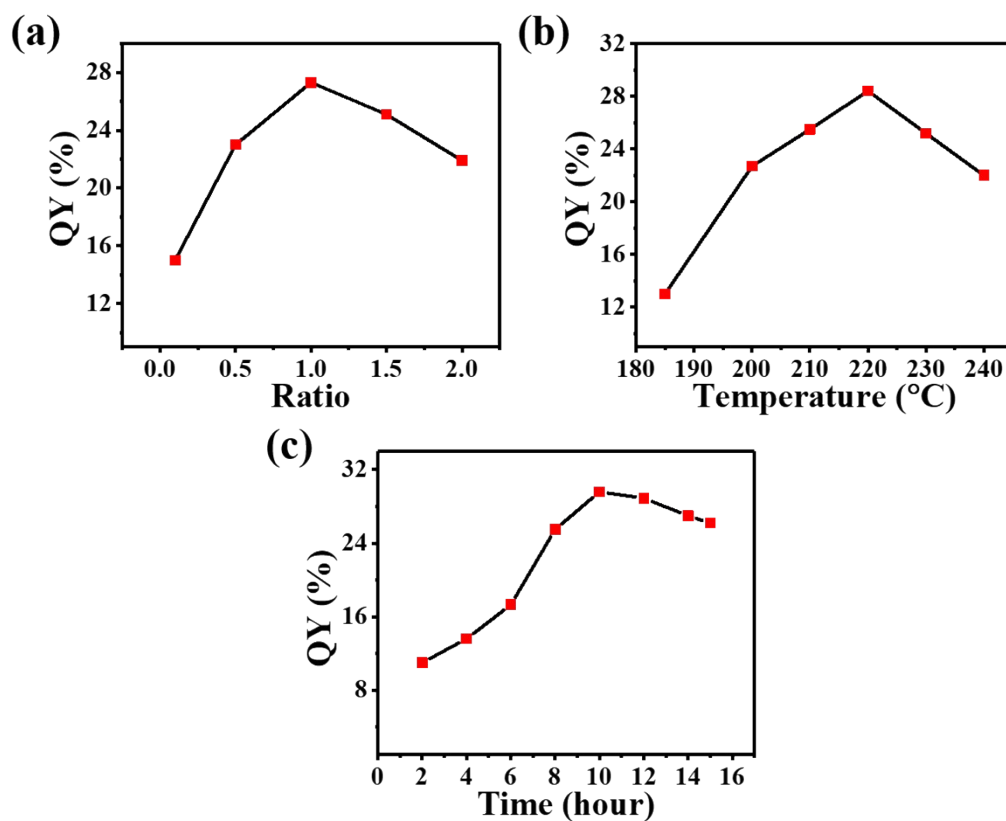

**Fig. S1** Quantum yield results by (a) ratio of sulfamide to O-phenylenediamine, (b) temperature, and (c) time of the solvothermal reaction.

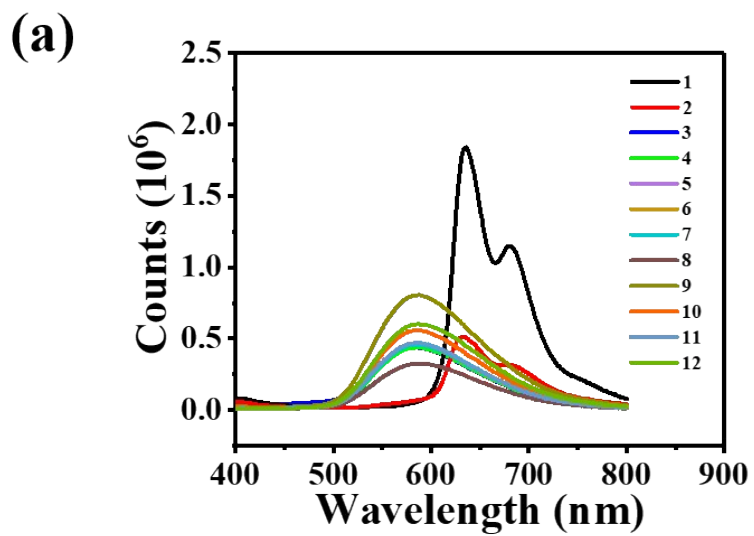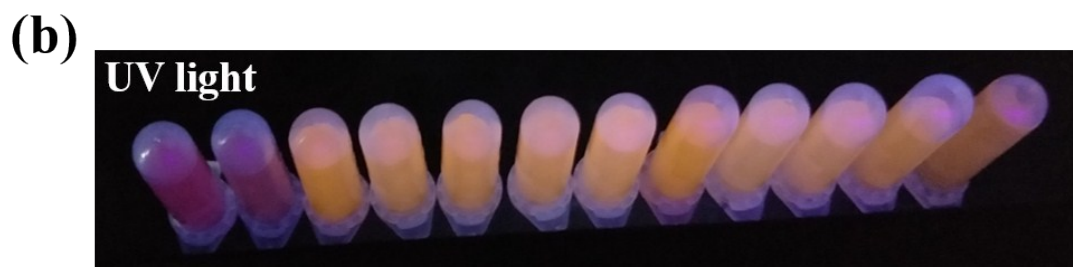

**Fig. S2** (a) PL spectrum of CDs under different pH conditions (Ex=560 nm). (b) Picture of CDs at different PH (left, 1-12) conditions under UV light ( $\lambda=365$  nm).

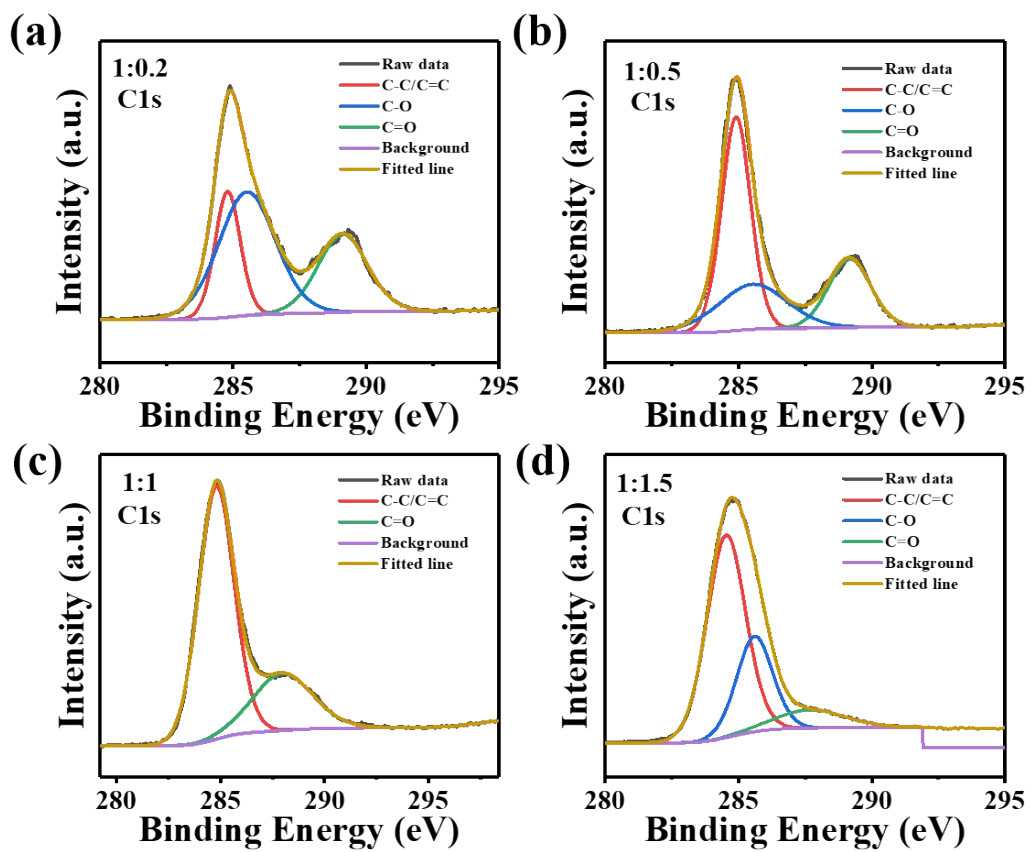

Fig. S3 High-resolution C1s XPS spectra for CDs of different precursor proportions.

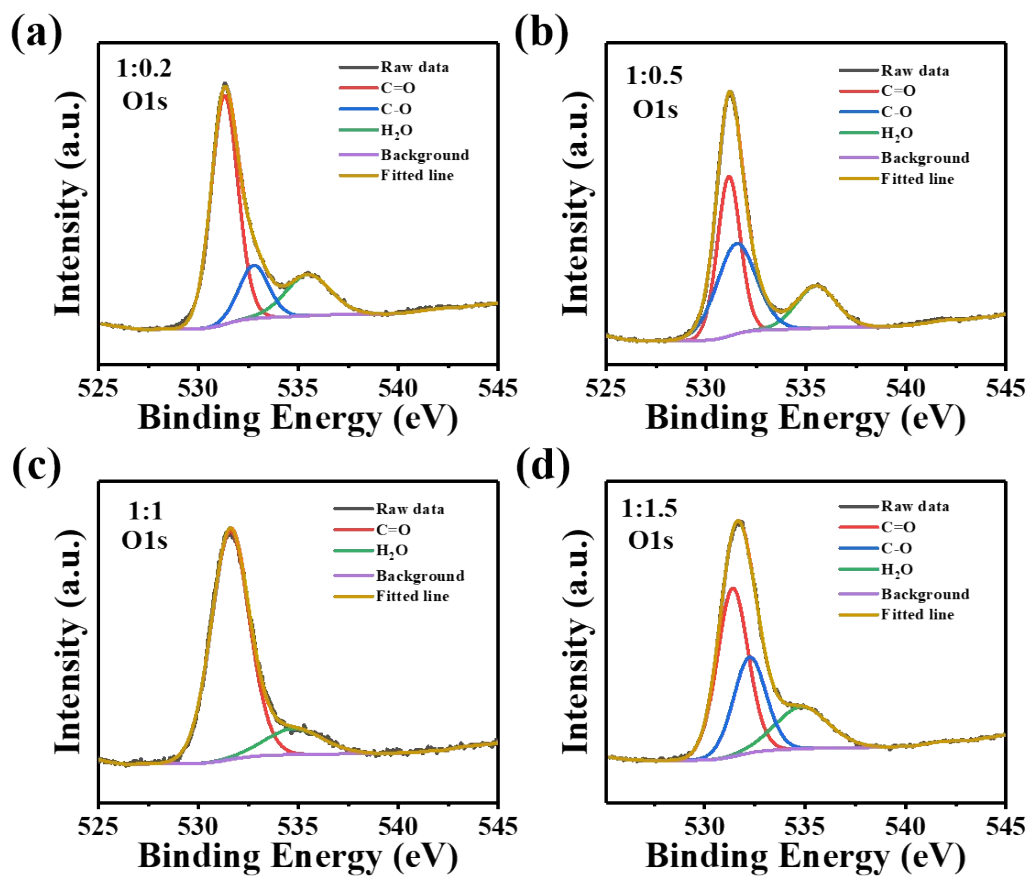

**Fig. S4** High-resolution O1s XPS spectra for CDs of different precursor proportions.

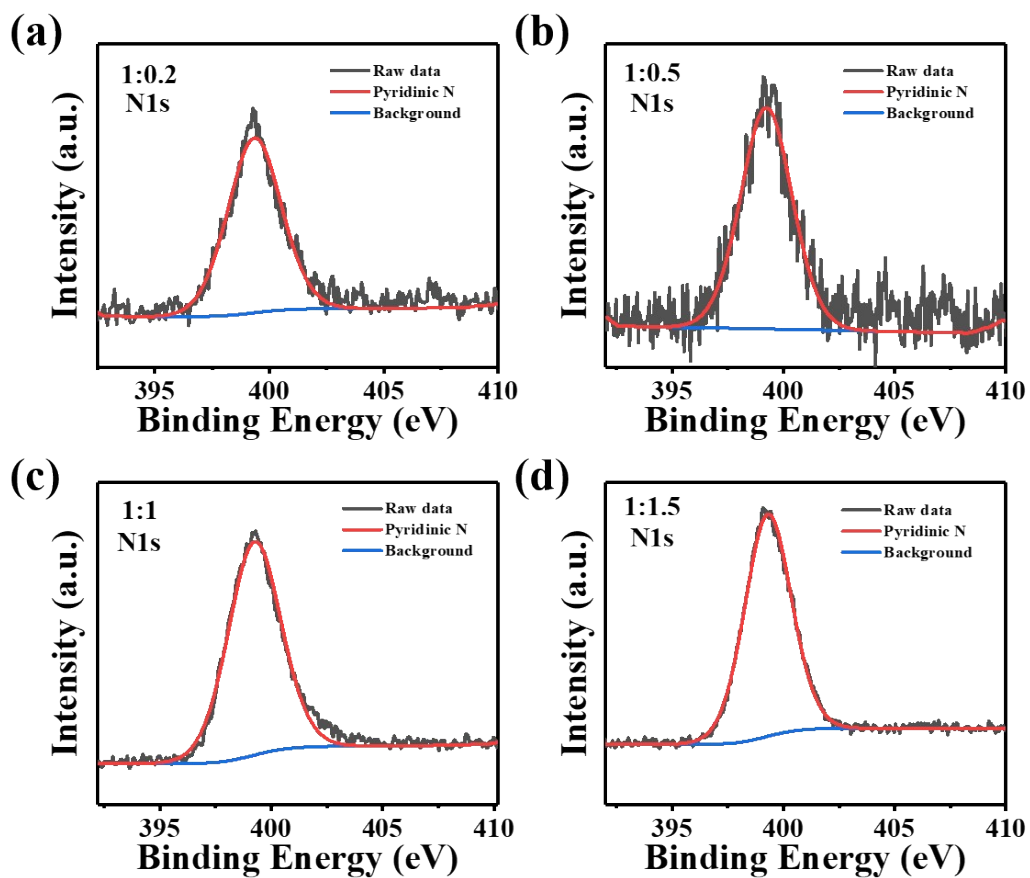

Fig. S5 High-resolution N1s XPS spectra for CDs of different precursor proportions.

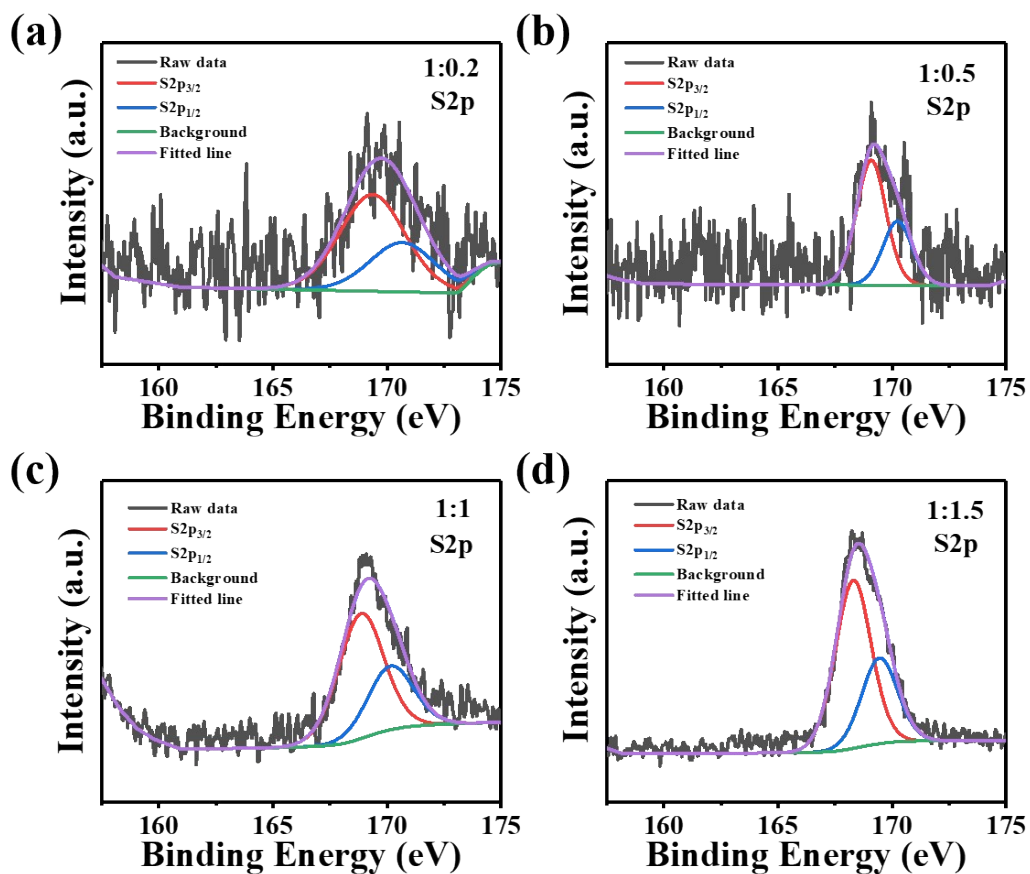

Fig. S6 High-resolution S2p XPS spectra for CDs of different precursor proportions.

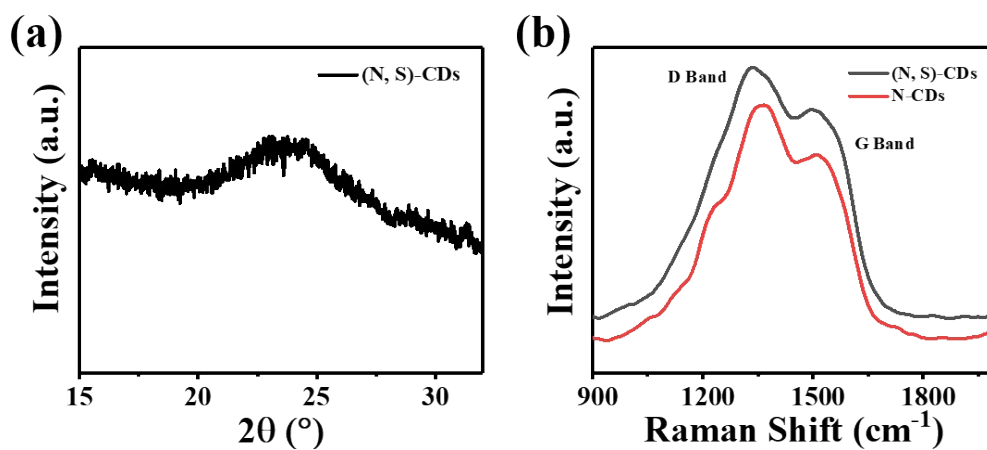

Fig. S7 (a) XRD and (b) Raman spectrum of the prepared CDs

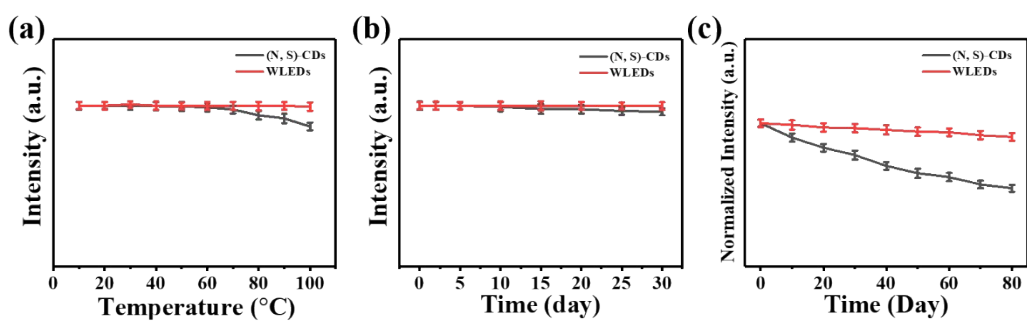

**Fig. S8** The PL intensity variation of the CDs phosphors and WLEDs versus (a) changing temperature and (b) different storage time in ambient environment. (c) Evolution of the PL intensity of CDs and WLEDs, under UV light (12W, 360 nm)

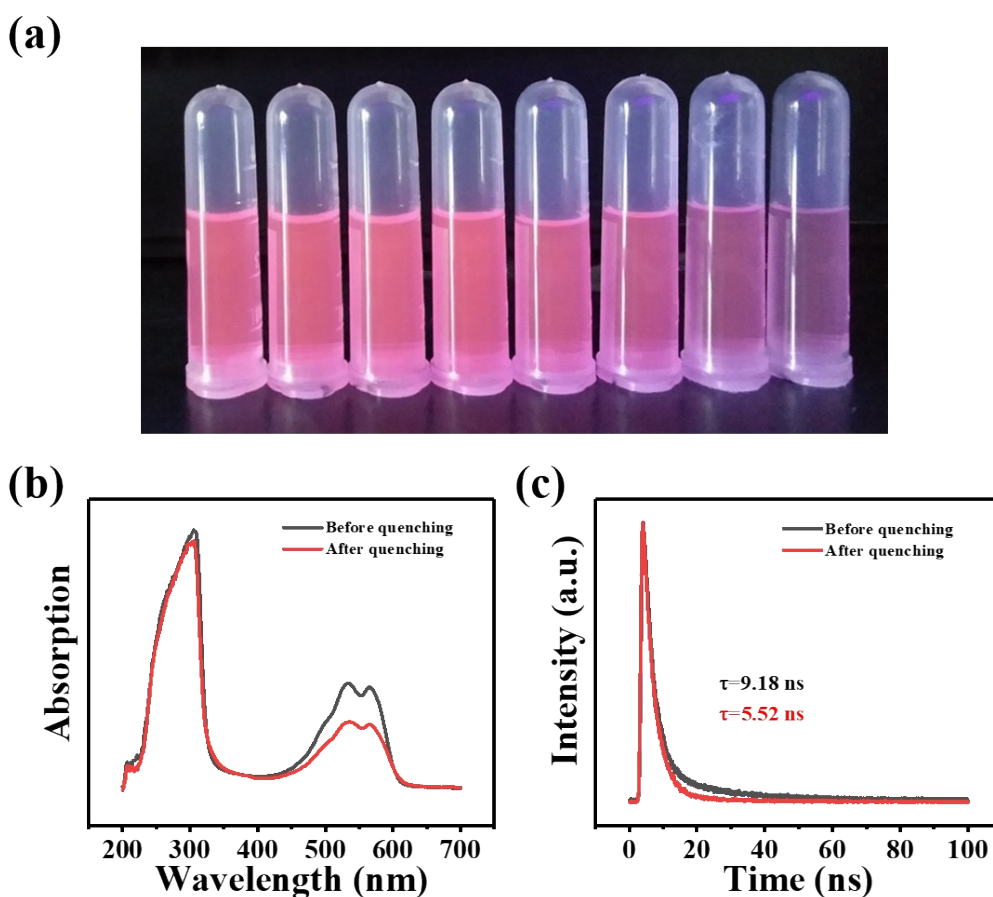

**Fig. S9** (a) PL photos of 30  $\mu$ L (N, S)-CDs dispersed in ethanol with various water contents (%) under 365 nm UV light. (b) Absorption spectra and (c) lifetimes of (N, S)-CDs before and after the quenching of ethanol with water contents of 70%.

**Table S1.** The amplitudes and time constants for two-component exponential fits of the four CDs samples.

| Samples | $\lambda/\text{nm}$ | $\tau_1/\text{ns}$ | A1/%  | $\tau_2/\text{ns}$ | A2/%  | $\chi^2$ | $\tau/\text{ns}$ |
|---------|---------------------|--------------------|-------|--------------------|-------|----------|------------------|
| 1:0.2   | 625                 | 2.76               | 92.93 | 20.08              | 7.07  | 1.074    | 3.98             |
| 1:0.5   |                     | 3.30               | 72.72 | 17.90              | 27.28 | 1.051    | 7.28             |
| 1:1     |                     | 4.21               | 68.33 | 19.90              | 31.67 | 1.012    | 9.18             |
| 1:1.5   |                     | 3.15               | 80.91 | 17.83              | 19.09 | 1.090    | 5.95             |

**Table S2.** Intermediate parameters for analysis of water content detection results.

| Water content<br>(%) | Em = 600 nm  |                       | Em = 650 nm  |                       |
|----------------------|--------------|-----------------------|--------------|-----------------------|
|                      | F ( $10^6$ ) | $\Delta F$ ( $10^6$ ) | F ( $10^6$ ) | $\Delta F$ ( $10^6$ ) |
| 0                    | 4.208        | 0.139                 | 3.158        | 0.084                 |
| 2                    | 4.069        | 0.348                 | 3.074        | 0.141                 |
| 5                    | 3.860        | 0.653                 | 3.017        | 0.248                 |
| 10                   | 3.555        | 0.986                 | 2.910        | 0.527                 |
| 30                   | 3.222        | 1.196                 | 2.631        | 0.799                 |
| 40                   | 3.012        | 1.217                 | 2.359        | 0.992                 |
| 50                   | 2.991        | 1.739                 | 2.166        | 1.408                 |
| 70                   | 2.469        |                       | 1.750        |                       |
